# Supplementary material
Source: Springer Nature journal article supplement (https://www.springermedizin.de/resource/supplementary/13643_2012_50_MOESM1_ESM.pdf/9681370)
Supplement: MOESM1 [file 9681370]

**‘Known set’ of intervention studies with controlled vocabulary terms**

| Article                                                                                                                                                                                                                                                  | PubMed                                                                                                                                                                                                                                                                                                                                 | Psych Info                                                                                                                                                                                                                                                                                                                                                        | CINAHL                                                                                                                                                                                                                                                                                                                                                                                                                                                                                                                                                                                                                                                                                                                                                                                                                                                                                                                                                                                                                                                                                                | Sociological abstracts/<br>ERIC/PAIS/<br>Social Services<br>Abstracts |
|----------------------------------------------------------------------------------------------------------------------------------------------------------------------------------------------------------------------------------------------------------|----------------------------------------------------------------------------------------------------------------------------------------------------------------------------------------------------------------------------------------------------------------------------------------------------------------------------------------|-------------------------------------------------------------------------------------------------------------------------------------------------------------------------------------------------------------------------------------------------------------------------------------------------------------------------------------------------------------------|-------------------------------------------------------------------------------------------------------------------------------------------------------------------------------------------------------------------------------------------------------------------------------------------------------------------------------------------------------------------------------------------------------------------------------------------------------------------------------------------------------------------------------------------------------------------------------------------------------------------------------------------------------------------------------------------------------------------------------------------------------------------------------------------------------------------------------------------------------------------------------------------------------------------------------------------------------------------------------------------------------------------------------------------------------------------------------------------------------|-----------------------------------------------------------------------|
| <p><b>I. Peragallo, N DeForge, B O’Campo, P Mi Lee, S Ju Kim, Y Cianelli, R Ferrer, L.</b> (2005). <i>A randomized clinical trial of an HIV-risk-reduction intervention among low-income Latina women.</i> <u>Nursing Research</u>, 54 (2), 108-118.</p> | <p>MH - Acculturation<br/>MH - Adolescent<br/>MH - Adult<br/>MH - Female<br/>MH - HIV Infections/*prevention &amp; control<br/>MH - *Health Education<br/>MH - *Hispanic Americans<br/>MH - Humans<br/>MH - *Mexican Americans<br/>MH - Poverty<br/>MH - *Risk Reduction Behavior<br/>MH - *Sexual Behavior<br/>MH - United States</p> | <p>Subject headings:<br/><u>*AIDS Prevention</u><br/><u>*Hispanics</u><br/><u>*HIV</u><br/><u>*Human Females</u><br/><u>*Sexual Risk Taking Intervention</u><br/><u>Lower Income Level</u><br/><u>Urban Environments</u></p> <p>Key concepts<br/><u>low-income Latina Women, HIV risk reduction intervention, high-HIV-risk sexual behaviors, urban areas</u></p> | <p><u>Adult</u><br/><u>Bandura's Social Cognitive Theory</u><br/><u>Bivariate Statistics</u><br/><u>Chi Square Test</u><br/><u>Clinical Trials</u><br/><u>Coefficient Alpha</u><br/><u>Condoms / ut [Utilization]</u><br/><u>Convenience Sample</u><br/><u>Cultural Sensitivity</u><br/><u>Data Analysis Software</u><br/><u>Descriptive Statistics</u><br/><u>Effect Size</u><br/><u>Female</u><br/><u>Funding Source</u><br/><u>*HIV Education</u><br/><u>*HIV Infections / pc [Prevention and Control]</u><br/><u>Health Knowledge / ev [Evaluation]</u><br/><u>*Hispanics</u><br/><u>Illinois</u><br/><u>Interviews</u><br/><u>Mexico</u><br/><u>Multivariate Analysis</u><br/><u>Poverty</u><br/><u>Professional Practice, Theory-Based</u><br/><u>Puerto Rico</u><br/><u>Random Assignment</u><br/><u>Regression</u><br/><u>Repeated Measures</u><br/><u>Research Subject Recruitment</u><br/><u>*Risk Taking Behavior / pc [Prevention and Control]</u><br/><u>Safe Sex</u><br/><u>Sample Size</u><br/><u>Scales</u><br/><u>Teaching Methods</u><br/><u>*Transcultural CareUrban Areas</u></p> | <p>not found</p>                                                      |

|                                                                                                                                                                                                                                                 |                                                                                                                                                                                                                                                                                                                                                                                                                                                                                                                                                                                                                                                                                                                                                                                                       |                                                                                                                                                                                                                                                                                                                                                                                                                                                                                                          |                                                                                                                                                                                                                                                                                                                                                                                                                                                                                                                    |                  |
|-------------------------------------------------------------------------------------------------------------------------------------------------------------------------------------------------------------------------------------------------|-------------------------------------------------------------------------------------------------------------------------------------------------------------------------------------------------------------------------------------------------------------------------------------------------------------------------------------------------------------------------------------------------------------------------------------------------------------------------------------------------------------------------------------------------------------------------------------------------------------------------------------------------------------------------------------------------------------------------------------------------------------------------------------------------------|----------------------------------------------------------------------------------------------------------------------------------------------------------------------------------------------------------------------------------------------------------------------------------------------------------------------------------------------------------------------------------------------------------------------------------------------------------------------------------------------------------|--------------------------------------------------------------------------------------------------------------------------------------------------------------------------------------------------------------------------------------------------------------------------------------------------------------------------------------------------------------------------------------------------------------------------------------------------------------------------------------------------------------------|------------------|
| <p><b>2. Kocken, P Voorham, T Brandsma, J Swart, W. (2001).</b> <i>Effects of peer-led AIDS education aimed at Turkish and Moroccan male immigrants in The Netherlands.</i> <u>European Journal of Public Health</u>, 11(2), 153-159.</p>       | <p>MH - Acquired Immunodeficiency Syndrome/*prevention &amp; control/transmission<br/> MH - Adolescent<br/> MH - Adult<br/> MH - Condoms/utilization<br/> MH - Disease Transmission, Horizontal/prevention &amp; control<br/> MH - Educational Status<br/> MH - Health Education/*methods<br/> MH - *Health Knowledge, Attitudes, Practice<br/> MH - Humans<br/> MH - Logistic Models<br/> MH - Male<br/> MH - Middle Aged<br/> MH - Morocco/ethnology<br/> MH - Multivariate Analysis<br/> MH - Netherlands/epidemiology<br/> MH - *Peer Group<br/> MH - Program Evaluation<br/> MH - Questionnaires<br/> MH - Risk Assessment<br/> MH - Sexual Behavior/ethnology<br/> MH - Socioeconomic Factors<br/> MH - Transients and Migrants/*statistics &amp; numerical data<br/> MH - Turkey/ethnology</p> | <p>Subject Headings:<br/> *<u>AIDS Prevention</u><br/> *<u>Health Education</u><br/> *<u>Immigration</u><br/> *<u>Peers</u><br/> <u>Condoms</u><br/> <u>Family Planning Attitudes</u><br/> <u>Health Attitudes</u><br/> <u>Human Males</u><br/> <u>Program Evaluation</u></p> <p>Key concepts<br/> <u>AIDS education,</u><br/> <u>immigrant men, Turkish</u><br/> <u>immigrants, Moroccan</u><br/> <u>immigrants, Netherlands,</u><br/> <u>perceived AIDS threat,</u><br/> <u>condom use beliefs</u></p> | <p>not found</p>                                                                                                                                                                                                                                                                                                                                                                                                                                                                                                   | <p>not found</p> |
| <p><b>3. McQuiston, C Flaskerud, JH (2003)</b> <i>“If they don’t ask about condoms, I just tell them”: A descriptive case study of Latino lay health advisers’ helping activities.</i> <u>Health Education and Behavior</u>, 30 (1), 79-96.</p> | <p>MH - Adolescent<br/> MH - Adult<br/> MH - Attitude to Health/*ethnology<br/> MH - Communication Barriers<br/> MH - *Community Health Aides<br/> MH - Condoms/*utilization<br/> MH - Female<br/> MH - HIV Infections/ethnology/*prevention &amp; control<br/> MH - Health Education/*manpower/organization &amp; administration<br/> MH - Health Promotion/*manpower/organization &amp; administration<br/> MH - Humans<br/> MH - Male</p>                                                                                                                                                                                                                                                                                                                                                          | <p>Subject Headings:<br/> *<u>AIDS Prevention</u><br/> *<u>Educational Programs</u><br/> *<u>Health Education</u><br/> *<u>Hispanics</u><br/> *<u>HIV</u></p> <p>Key concepts<br/> <u>lay health adviser</u><br/> <u>program, prevention,</u><br/> <u>HIV, AIDS, Mexican</u><br/> <u>Americans</u></p>                                                                                                                                                                                                   | <p><u>Acculturation</u><br/> <u>Adult</u><br/> <u>Audiorecording</u><br/> <u>Case Studies</u><br/> <u>Community Health Services</u><br/> <u>Community Health Services / ev [Evaluation]</u><br/> <u>Condoms</u><br/> <u>Content Analysis</u><br/> <u>Control (Psychology)</u><br/> <u>Cultural Sensitivity</u><br/> <u>Descriptive Research</u><br/> <u>Descriptive Statistics</u><br/> <u>Ethnography</u><br/> <u>Evaluation Research</u><br/> <u>Female</u><br/> <u>Fieldwork</u><br/> <u>Funding Source</u></p> | <p>not found</p> |

|                                                                                                                                                                                                          |                                                                                                                                                                                                                                                                                                                                                                                                                                                                                                                                                                                                                       |                  |                                                                                                                                                                                                                                                                                                                                                                                                                                                                                                                                                                                                                                                                                                          |                                                                                                                                                                                                                  |
|----------------------------------------------------------------------------------------------------------------------------------------------------------------------------------------------------------|-----------------------------------------------------------------------------------------------------------------------------------------------------------------------------------------------------------------------------------------------------------------------------------------------------------------------------------------------------------------------------------------------------------------------------------------------------------------------------------------------------------------------------------------------------------------------------------------------------------------------|------------------|----------------------------------------------------------------------------------------------------------------------------------------------------------------------------------------------------------------------------------------------------------------------------------------------------------------------------------------------------------------------------------------------------------------------------------------------------------------------------------------------------------------------------------------------------------------------------------------------------------------------------------------------------------------------------------------------------------|------------------------------------------------------------------------------------------------------------------------------------------------------------------------------------------------------------------|
|                                                                                                                                                                                                          | <p>MH - Mexican Americans/*education/psychology<br/> MH - North Carolina<br/> MH - Organizational Case Studies<br/> MH - Program Evaluation<br/> MH - Qualitative Research<br/> MH - Sexual Behavior/*ethnology<br/> MH - Sexually Transmitted Diseases/ethnology/*prevention &amp; control<br/> MH - Social Support<br/> MH - Vulnerable Populations</p>                                                                                                                                                                                                                                                             |                  | <p><u>HIV Education</u><br/> *<u>HIV Infections</u> / <u>eh</u> [Ethnology]<br/> *<u>HIV Infections</u> / <u>pc</u> [Prevention and Control]<br/> <u>Health Education</u><br/> <u>Health Promotion</u><br/> <u>Hispanics</u><br/> <u>Immigrants</u><br/> <u>Male</u><br/> <u>Medically Underserved</u><br/> <u>North Carolina</u><br/> <u>Participant Observation</u><br/> <u>Professional Role</u><br/> <u>Program Evaluation</u><br/> <u>Questionnaires</u><br/> <u>Referral and Consultation</u><br/> <u>Semi-Structured Interview</u><br/> <u>Summated Rating Scaling</u><br/> <u>Support, Psychosocial</u><br/> <u>Volunteer Workers</u> / <u>ed</u> [Education]<br/> *<u>Volunteer Workers</u></p> |                                                                                                                                                                                                                  |
| <p><b>4. Loue, S Lloyd, LS Phoombour, E. (1996). Organizing Asian Pacific Islanders in an urban community to reduce HIV risk: A case study. <u>AIDS Education and Prevention</u>, 8(5), 381-393.</b></p> | <p>MH - Acquired Immunodeficiency Syndrome/ethnology/*prevention &amp; control<br/> MH - Asia, Southeastern/ethnology<br/> MH - *Asian Americans<br/> MH - California<br/> MH - Community Networks/*organization &amp; administration<br/> MH - Community-Institutional Relations<br/> MH - Consumer Participation/*methods<br/> MH - Far East/ethnology<br/> MH - Humans<br/> MH - Interinstitutional Relations<br/> MH - Longitudinal Studies<br/> MH - Organizations, Nonprofit/*organization &amp; administration<br/> MH - Pacific Islands/ethnology<br/> MH - Program Evaluation<br/> MH - *Social Planning</p> | <p>not found</p> | <p>*<u>Asians</u><br/> <u>California</u><br/> *<u>Communities</u><br/> <u>Community Assessment</u><br/> <u>Community Networks</u><br/> <u>Community Role</u><br/> <u>Focus Groups</u><br/> *<u>HIV Education</u><br/> *<u>HIV Infections</u> / <u>pc</u> [Prevention and Control]<br/> *<u>Program Development</u><br/> <u>Questionnaires</u><br/> <u>Urban Areas</u></p>                                                                                                                                                                                                                                                                                                                                | <p>*Acquired Immune Deficiency Syndrome;<br/> *Health Education;<br/> *Community Organizations;<br/> *Oceanic Cultural Groups;<br/> *Program Implementation;<br/> *Program Evaluation; San Diego, California</p> |

|                                                                                                                                                                                                                                                            |                                                                                                                                                                                                                                                                                                                                                                                                                                                                                                                                                                                                                                                                                                                     |                                                                                                                                                                                                                                                                                                                                                                                                                                    |                                                                                                                                                                                                                                                                                                                                                                                                                                                                                                                                                                                                                                                                                                                                                                                                                                                                         |                                                                                                                                              |
|------------------------------------------------------------------------------------------------------------------------------------------------------------------------------------------------------------------------------------------------------------|---------------------------------------------------------------------------------------------------------------------------------------------------------------------------------------------------------------------------------------------------------------------------------------------------------------------------------------------------------------------------------------------------------------------------------------------------------------------------------------------------------------------------------------------------------------------------------------------------------------------------------------------------------------------------------------------------------------------|------------------------------------------------------------------------------------------------------------------------------------------------------------------------------------------------------------------------------------------------------------------------------------------------------------------------------------------------------------------------------------------------------------------------------------|-------------------------------------------------------------------------------------------------------------------------------------------------------------------------------------------------------------------------------------------------------------------------------------------------------------------------------------------------------------------------------------------------------------------------------------------------------------------------------------------------------------------------------------------------------------------------------------------------------------------------------------------------------------------------------------------------------------------------------------------------------------------------------------------------------------------------------------------------------------------------|----------------------------------------------------------------------------------------------------------------------------------------------|
| <p><b>5. Worth, H Denholm, N Bannister, J. (2003).</b> <i>HIV/AIDS and the African refugee education program in New Zealand.</i> <u>AIDS Education and Prevention</u>, 15(4), 346-356.</p>                                                                 | <p>MH - Adult<br/> MH - Africa/ethnology<br/> MH - Attitude to Health/*ethnology<br/> MH - Community Health Services/*organization &amp; administration<br/> MH - Cultural Characteristics<br/> MH - Emigration and Immigration<br/> MH - Female<br/> MH - HIV<br/> Seropositivity/*ethnology/*psychology/therapy<br/> MH - Health Education/methods/*organization &amp; administration<br/> MH - Health Promotion/methods/organization &amp; administration<br/> MH - Heterosexuality/ethnology<br/> MH - Humans<br/> MH - Male<br/> MH - New Zealand<br/> MH - Qualitative Research<br/> MH - Refugees/education/*psychology<br/> MH - Safe Sex/ethnology<br/> MH - Social Isolation<br/> MH - Social Support</p> | <p>Subject Headings:<br/> <u>*AIDS</u><br/> <u>*AIDS Prevention</u><br/> <u>*Health Education</u><br/> <u>*HIV</u><br/> <u>*Refugees</u><br/> <u>Blacks</u></p> <p>Key concepts<br/> <u>human immunodeficiency virus, acquired immune deficiency syndrome, education program, HIV positive refugees, National HIV/AIDS Refugee Health Education Program</u></p>                                                                    | <p><u>Adult</u><br/> <u>Africa</u><br/> <u>*Attitude to Health / eh [Ethnology]</u><br/> <u>*Community Health Services / am [Administration]</u><br/> <u>Culture</u><br/> <u>Female</u><br/> <u>HIV Seropositivity / th [Therapy]</u><br/> <u>*HIV Seropositivity / eh [Ethnology]</u><br/> <u>Health Education / mt [Methods]</u><br/> <u>*Health Education / am [Administration]</u><br/> <u>Health Promotion / am [Administration]</u><br/> <u>Health Promotion / mt [Methods]</u><br/> <u>Heterosexuality / eh [Ethnology]</u><br/> <u>Interpersonal Relations</u><br/> <u>Male</u><br/> <u>Narratives</u><br/> <u>New Zealand</u><br/> <u>Qualitative Studies</u><br/> <u>Refugees / ed [Education]</u><br/> <u>*Refugees / pf [Psychosocial Factors]</u><br/> <u>Safe Sex / eh [Ethnology]</u><br/> <u>Social Isolation</u><br/> <u>Support, Psychosocial</u></p> | <p>*Acquired Immune Deficiency Syndrome; *New Zealand; *African Cultural Groups; *Refugees; *Health Education; Relocation; Public Health</p> |
| <p><b>6. Martijn, C de Vries, NK Voorham, T Brandsma, J Medi, M Hospers, HJ. (2004).</b> <i>The effects of AIDS prevention programs by lay health advisors for migrants in The Netherlands.</i> <u>Patient Education and Counselling</u>, 53, 157-165.</p> | <p>MH - Acquired Immunodeficiency Syndrome/*prevention &amp; control<br/> MH - Adult<br/> MH - Attitude to Health/ethnology<br/> MH - Community Health Aides/*organization &amp; administration<br/> MH - Condoms/utilization<br/> MH - Female<br/> MH - Health Education/*organization &amp; administration<br/> MH - Health Knowledge, Attitudes, Practice<br/> MH - Humans<br/> MH - Iraq/ethnology<br/> MH - Male<br/> MH - Morocco/ethnology<br/> MH - Motivation<br/> MH - Needs Assessment<br/> MH - Netherlands<br/> MH - Professional Competence/standards<br/> MH - Program Evaluation<br/> MH - Questionnaires<br/> MH - Safe Sex</p>                                                                    | <p>Subject Headings:<br/> <u>*AIDS</u><br/> <u>*AIDS Prevention</u><br/> <u>*Health Attitudes</u><br/> <u>*Immigration</u><br/> <u>*Program Evaluation</u><br/> <u>Health Promotion</u></p> <p>Key concepts<br/> <u>lay health advisors, AIDS prevention programs, Turkish &amp; Moroccan migrants, program effectiveness, acquired immunodeficiency syndrome, program evaluation, professional health advisors, attitudes</u></p> | <p><u>*Acquired Immunodeficiency Syndrome / pc [Prevention and Control]</u><br/> <u>Adult</u><br/> <u>Analysis of Variance</u><br/> <u>Condoms / ut [Utilization]</u><br/> <u>Correlation Coefficient</u><br/> <u>Descriptive Statistics</u><br/> <u>Female</u><br/> <u>*HIV Education / mt [Methods]</u><br/> <u>Health Knowledge</u><br/> <u>*Health Personnel</u><br/> <u>*Immigrants</u><br/> <u>Iraq / eh [Ethnology]</u><br/> <u>Male</u><br/> <u>Middle Age</u><br/> <u>Morocco / eh [Ethnology]</u><br/> <u>Netherlands</u><br/> <u>Pretest-Posttest Design</u><br/> <u>Program Evaluation</u><br/> <u>Questionnaires</u><br/> <u>Regression</u><br/> <u>Summated Rating Scaling</u></p>                                                                                                                                                                        | <p>not found</p>                                                                                                                             |

|                                                                                                                                                                                                                                                                                              |                                                                                                                                                                                                                                                                                                                                                                                                                                                                                                                                                   |                                                                                                                                                                                                                                                                                                                                                                                                                |                                |                                                                                                                                                                     |
|----------------------------------------------------------------------------------------------------------------------------------------------------------------------------------------------------------------------------------------------------------------------------------------------|---------------------------------------------------------------------------------------------------------------------------------------------------------------------------------------------------------------------------------------------------------------------------------------------------------------------------------------------------------------------------------------------------------------------------------------------------------------------------------------------------------------------------------------------------|----------------------------------------------------------------------------------------------------------------------------------------------------------------------------------------------------------------------------------------------------------------------------------------------------------------------------------------------------------------------------------------------------------------|--------------------------------|---------------------------------------------------------------------------------------------------------------------------------------------------------------------|
|                                                                                                                                                                                                                                                                                              | MH - Sex Education/*organization & administration<br>MH - Transients and Migrants/*education/psychology<br>MH - Turkey/ethnology                                                                                                                                                                                                                                                                                                                                                                                                                  |                                                                                                                                                                                                                                                                                                                                                                                                                | <u>Turkey / eh [Ethnology]</u> |                                                                                                                                                                     |
| <b>7. Dushay, RA<br/>Singer, M Weeks,<br/>MR Rohena, L<br/>Gruber, R. (2001).</b><br><i>Lowering HIV risk among ethnic minority drug users: comparing culturally targeted intervention to a standard intervention.</i><br><u>American Journal of Drug and Alcohol Abuse</u> , 27(3) 501-524. | MH - Acquired Immunodeficiency Syndrome/*prevention & control<br>MH - Adult<br>MH - African Americans/psychology<br>MH - Analysis of Variance<br>MH - Cultural Characteristics<br>MH - Female<br>MH - Health Education<br>MH - Hispanic Americans/psychology<br>MH - Humans<br>MH - Intervention Studies<br>MH - Male<br>MH - Middle Aged<br>MH - Minority Groups/*psychology<br>MH - Patient Dropouts/psychology<br>MH - Puerto Rico<br>MH - Risk-Taking<br>MH - Self Concept<br>MH - Self Efficacy<br>MH - Substance Abuse, Intravenous/*psycho | Subject Headings:<br><u>*Early Intervention</u><br><u>*HIV</u><br><u>*Intravenous Drug Usage</u><br><u>*Minority Groups</u><br><u>*Sexual Risk Taking</u><br><u>Drug Therapy</u><br><u>Prevention</u><br><br>Key concepts<br><u>culturally competent interventions, drug treatment, HIV risk, injection drug use, prevention, ethnic minorities</u>                                                            |                                | *Acquired Immune Deficiency Syndrome; *Risk; *Drug Abuse; *Prevention; *Intervention; *Black Americans; *Puerto Rican Americans; *Cultural Sensitivity; Connecticut |
| <b>8. Operario, D<br/>Nemoto, T Syed, J<br/>Mazarei, M. (2005).</b><br><i>Conducting HIV interventions for Asian Pacific Islander men who have sex with men: Challenges and compromises in community collaborative research.</i> <u>AIDS Education and Prevention</u> , 17(4), 334-346.      | MH - Adolescent<br>MH - Adult<br>MH - *Asian Americans<br>MH - California<br>MH - Community Health Centers/*organization & administration<br>MH - *Cooperative Behavior<br>MH - HIV Infections/*prevention & control<br>MH - *Homosexuality, Male<br>MH - Humans<br>MH - Male<br>MH - *Oceanic Ancestry Group<br>MH - Organizational Case Studies<br>MH - Organizational Culture                                                                                                                                                                  | Subject Headings:<br><u>*AIDS Prevention</u><br><u>*Communities</u><br><u>*HIV</u><br><u>*Intervention</u><br><u>*Organizations</u><br><u>Asians</u><br><u>Cooperation</u><br><u>Experimentation</u><br><u>Human Males</u><br><u>Pacific Islanders</u><br>Key concepts<br><u>HIV prevention intervention, community based organization, Asian &amp; Pacific Islander men, community collaborative research</u> |                                | *Acquired Immune Deficiency Syndrome; *Intervention; *Asia; *Males; *Sexual Behavior; *Community Services; *Evaluation Research                                     |

|                                                                                                                                                                                                                                                 |                                                                                                                                                                                                                                                                                                                                                                                                                                                                                                                                                                                                                                                                                            |                                                                                                                                                                                                                                                                                                                                                                                                  |                                                                                                                                                                                                                                                                                                                                                                                                                                                                                                                                                                                                                                                                                                                                                                                                  |                                                                                                                                                                           |
|-------------------------------------------------------------------------------------------------------------------------------------------------------------------------------------------------------------------------------------------------|--------------------------------------------------------------------------------------------------------------------------------------------------------------------------------------------------------------------------------------------------------------------------------------------------------------------------------------------------------------------------------------------------------------------------------------------------------------------------------------------------------------------------------------------------------------------------------------------------------------------------------------------------------------------------------------------|--------------------------------------------------------------------------------------------------------------------------------------------------------------------------------------------------------------------------------------------------------------------------------------------------------------------------------------------------------------------------------------------------|--------------------------------------------------------------------------------------------------------------------------------------------------------------------------------------------------------------------------------------------------------------------------------------------------------------------------------------------------------------------------------------------------------------------------------------------------------------------------------------------------------------------------------------------------------------------------------------------------------------------------------------------------------------------------------------------------------------------------------------------------------------------------------------------------|---------------------------------------------------------------------------------------------------------------------------------------------------------------------------|
| <p><b>9. Soskolne, V Shtarkshall, RA. (2002).</b> <i>Migration and HIV prevention programmes: linking structural factors, culture, and individual behaviour-an Israeli experience.</i> <u>Social Science &amp; Medicine</u>, 55, 1297-1307.</p> | <p>MH - Adolescent<br/> MH - Adult<br/> MH - Attitude to Health/*ethnology<br/> MH - Communicable Disease<br/> Control/*organization &amp; administration<br/> MH - Culture<br/> MH - *Emigration and Immigration<br/> MH - Ethiopia/ethnology<br/> MH - HIV Infections/*ethnology/*prevention &amp; control<br/> MH - Humans<br/> MH - Israel/epidemiology<br/> MH - Middle Aged<br/> MH - Power (Psychology)<br/> MH - Preventive Health<br/> Services/*organization &amp; administration<br/> MH - Psychosocial Deprivation<br/> MH - Risk-Taking<br/> MH - Sexually Transmitted<br/> Diseases/*ethnology/*prevention &amp; control<br/> MH - Social Class<br/> MH - USSR/ethnology</p> | <p>Subject Headings:<br/> *<u>AIDS Prevention</u><br/> *<u>Cross Cultural Differences</u><br/> *<u>HIV</u><br/> *<u>Immigration</u><br/> *<u>Sociocultural Factors</u></p> <p>Key concepts<br/> <u>migration</u>, <u>HIV prevention programs</u>, <u>structural factors</u>, <u>culture</u>, <u>individual behaviors</u>, <u>former Soviet Union immigrants</u>, <u>Ethiopian immigrants</u></p> | <p><u>Culture</u><br/> *<u>Emigration and Immigration</u><br/> *<u>HIV Infections / pc [Prevention and Control]</u><br/> <u>Health Policy</u><br/> <u>Health Services Accessibility</u><br/> <u>Israel</u></p>                                                                                                                                                                                                                                                                                                                                                                                                                                                                                                                                                                                   | <p>*Migration; *Immigrants;<br/> *Acquired Immune Deficiency Syndrome;<br/> *Prevention; *Risk Factors;<br/> *Israel; Slavic Cultural Groups; African Cultural Groups</p> |
| <p><b>10. Amaro, HA Raj, A Reed, E Cranston, K (2002).</b> <i>Implementation and long-term outcomes of two HIV intervention programs for Latinas.</i> <u>Health Promotion Practice</u>, 3(2), 245-254.</p>                                      | <p>not found</p>                                                                                                                                                                                                                                                                                                                                                                                                                                                                                                                                                                                                                                                                           | <p>not found</p>                                                                                                                                                                                                                                                                                                                                                                                 | <p><u>Adult</u><br/> <u>Collaboration</u><br/> <u>Community Health Services</u><br/> <u>Convenience Sample</u><br/> <u>Cultural Competence</u><br/> <u>Curriculum</u><br/> <u>Female</u><br/> *<u>HIV Education / mt [Methods]</u><br/> <u>HIV Infections / rf [Risk Factors]</u><br/> *<u>HIV Infections / eh [Ethnology]</u><br/> *<u>HIV Infections / pc [Prevention and Control]</u><br/> *<u>Hispanics</u><br/> <u>Intervention Trials</u><br/> <u>Interviews</u><br/> <u>Logistic Regression</u><br/> *<u>Outcomes (Health Care)</u><br/> <u>Patient Satisfaction</u><br/> <u>Process Assessment (Health Care)</u><br/> *<u>Program Implementation</u><br/> <u>Prospective Studies</u><br/> <u>Public Health Administration</u><br/> <u>Questionnaires</u><br/> *<u>Women's Health</u></p> | <p>not found</p>                                                                                                                                                          |

|                                                                                                                                                                                                                                  |                                                                                                                                                                                                                                                                                                                                                                                                      |                                                                                                                                                                                                                                                                                                                                                                 |                                                                                                                                                                                                      |                                                                                                                                                                                                                                                                                                                                                            |
|----------------------------------------------------------------------------------------------------------------------------------------------------------------------------------------------------------------------------------|------------------------------------------------------------------------------------------------------------------------------------------------------------------------------------------------------------------------------------------------------------------------------------------------------------------------------------------------------------------------------------------------------|-----------------------------------------------------------------------------------------------------------------------------------------------------------------------------------------------------------------------------------------------------------------------------------------------------------------------------------------------------------------|------------------------------------------------------------------------------------------------------------------------------------------------------------------------------------------------------|------------------------------------------------------------------------------------------------------------------------------------------------------------------------------------------------------------------------------------------------------------------------------------------------------------------------------------------------------------|
| <p><b>11. Organista, KC Carrillo, H Ayala, G (2004).</b> <i>HIV prevention with Mexican migrants.</i> <u>Journal of Acquired Immune Deficiency Syndrome</u>, 37 (Suppl 4) S227-S239.</p>                                         | <p>MH - Acculturation<br/> MH - Condoms/utilization<br/> MH - Female<br/> MH - HIV Infections/*prevention &amp; control<br/> MH - Homosexuality, Male<br/> MH - Humans<br/> MH - Male<br/> MH - Mexico/ethnology<br/> MH - Prostitution<br/> MH - Risk Factors<br/> MH - Risk-Taking<br/> MH - Sexual Partners<br/> MH - Social Class<br/> MH - *Transients and Migrants<br/> MH - United States</p> | <p>not found</p>                                                                                                                                                                                                                                                                                                                                                |                                                                                                                                                                                                      | <p>not found</p>                                                                                                                                                                                                                                                                                                                                           |
| <p><b>12. Wong, FY Lye Chng, C Lo, W. (1998).</b> <i>A profile of six community-based HIV prevention programs targeting Asian and Pacific Islander Americans.</i> <u>AIDS Education and Prevention</u>, 10 (Suppl A), 61-76.</p> | <p>MH - *Asian Americans<br/> MH - *Community Health Services<br/> MH - HIV Infections/*prevention &amp; control<br/> MH - Humans<br/> MH - Male<br/> MH - United States</p>                                                                                                                                                                                                                         | <p>Subject Headings:<br/> <u>*AIDS Prevention</u><br/> <u>*Community Services</u><br/> <u>*HIV</u><br/> <u>*Male Homosexuality</u><br/> <u>*Program Evaluation</u><br/> <u>Asians</u><br/> Key concepts:<br/> <u>evaluation of community-based HIV prevention programs.</u><br/> <u>Asian &amp; Pacific Islander American males how have sex with males</u></p> | <p><u>*Asians</u><br/> <u>*Community Health Services</u><br/> <u>Descriptive Statistics</u><br/> <u>*HIV Infections / pc [Prevention and Control]</u><br/> <u>Male</u><br/> <u>United States</u></p> | <p>*Oceanic Cultural Groups;<br/> *Asian Americans;<br/> *Acquired Immune Deficiency Syndrome;<br/> *Homosexual Relationships;<br/> *Males; *Community Organizations; *Bisexuality;<br/> *Health Care Services; Hawaii; Los Angeles, California; San Francisco, California; Philadelphia, Pennsylvania; New York City, New York; Boston, Massachusetts</p> |
| <p><b>13. Haour-Knipe, M Fleury, F Dubois-Archer, F. (1999).</b> <i>HIV/AIDS prevention for migrants and ethnic minorities: three phases of evaluation.</i> <u>Social Science and Medicine</u>, 49, 1357-1372.</p>               | <p>MH - Acquired Immunodeficiency Syndrome/*prevention &amp; control<br/> MH - HIV Infections/*prevention &amp; control<br/> MH - Humans<br/> MH - *Minority Groups<br/> MH - Program Evaluation/*methods<br/> MH - Switzerland<br/> MH - *Transients and Migrants</p>                                                                                                                               | <p>Subject Headings:<br/> <u>*AIDS Prevention</u><br/> <u>*Cultural Sensitivity</u><br/> <u>*Immigration</u><br/> <u>*Racial and Ethnic Groups</u><br/> <u>Minority Groups</u><br/> Key concepts<br/> <u>evaluation of HIV/AIDS prevention program, migrants &amp; ethnic minorities.</u><br/> <u>Switzerland</u></p>                                           |                                                                                                                                                                                                      | <p>*Acquired Immune Deficiency Syndrome;<br/> *Prevention; *Migrants;<br/> *Ethnic Groups; *Minority Groups;<br/> *Program Evaluation;<br/> *Switzerland;<br/> *Community Involvement;<br/> *Ethnic Neighborhoods</p>                                                                                                                                      |

|                                                                                                                                                                                                                                                            |                                                                                                                                                                                                                                                                                                                                                                                                                                                |                                                                                                                                                                                                                                                                                                                                                                                                                                                                                                                                                              |                                                                                                                                                                                                                                                                                                                                                                                                                                                                                                                                                                                    |                                                                                                                |
|------------------------------------------------------------------------------------------------------------------------------------------------------------------------------------------------------------------------------------------------------------|------------------------------------------------------------------------------------------------------------------------------------------------------------------------------------------------------------------------------------------------------------------------------------------------------------------------------------------------------------------------------------------------------------------------------------------------|--------------------------------------------------------------------------------------------------------------------------------------------------------------------------------------------------------------------------------------------------------------------------------------------------------------------------------------------------------------------------------------------------------------------------------------------------------------------------------------------------------------------------------------------------------------|------------------------------------------------------------------------------------------------------------------------------------------------------------------------------------------------------------------------------------------------------------------------------------------------------------------------------------------------------------------------------------------------------------------------------------------------------------------------------------------------------------------------------------------------------------------------------------|----------------------------------------------------------------------------------------------------------------|
| <p><b>14. McMahon, T Fairley, C Donovan, B Quin, J Wan, L.</b> <i>Effects of an ethnic media campaign on patterns of HIV testing among people from CALD backgrounds in Australia.</i> <u>Sexual Health 2 (1), 2004.</u></p>                                | <p>MH - Adult<br/> MH - Australia<br/> MH - Communications Media<br/> MH - Cultural Diversity<br/> MH - Ethnic Groups/*statistics &amp; numerical data<br/> MH - Female<br/> MH - HIV Infections/*diagnosis<br/> MH - Health Education/methods/*statistics &amp; numerical data<br/> MH - Humans<br/> MH - Language<br/> MH - Male<br/> MH - Mass Media<br/> MH - Mass Screening/*statistics &amp; numerical data<br/> MH - Pilot Projects</p> | <p>not found</p>                                                                                                                                                                                                                                                                                                                                                                                                                                                                                                                                             |                                                                                                                                                                                                                                                                                                                                                                                                                                                                                                                                                                                    | <p>not found</p>                                                                                               |
| <p><b>15. Vinh-Thomas, P Bunch, MM Card, JJ. (2003).</b> <i>A research-based tool for identifying and strengthening culturally competent and evaluation-ready HIV/AIDS prevention programs.</i> <u>AIDS Education and Prevention, 15 (6), 481-498.</u></p> | <p>MH - *Cultural Diversity<br/> MH - *Evidence-Based Medicine<br/> MH - HIV Infections/*prevention &amp; control<br/> MH - Health Services Research<br/> MH - Humans<br/> MH - Preventive Health Services/*organization &amp; administration/standards<br/> MH - Program Development<br/> MH - Program Evaluation<br/> MH - *Self Efficacy<br/> MH - United States</p>                                                                        | <p>Subject Headings:<br/> <u>*AIDS Prevention</u><br/> <u>*Cultural Sensitivity</u><br/> <u>*Health Care Delivery</u><br/> <u>*Program Development</u><br/> <u>*Program Evaluation</u><br/> <u>Health Care Services</u><br/> <u>HIV</u><br/> <u>Minority Groups</u></p> <p>Key concepts<br/> <u>HIV/AIDS prevention</u><br/> <u>programs, health service</u><br/> <u>delivery, cultural</u><br/> <u>competence, minority</u><br/> <u>populations, cultural</u><br/> <u>sensitivity, racial</u><br/> <u>disparities, evaluation</u><br/> <u>readiness</u></p> | <p><u>*Cultural Competence</u><br/> <u>*HIV Infections / pc [Prevention and Control]</u><br/> <u>Health Services Research</u><br/> <u>Instrument Construction</u><br/> <u>Interrater Reliability</u><br/> <u>Interviews</u><br/> <u>*Medical Practice, Evidence-Based</u><br/> <u>Pretest-Posttest Design</u><br/> <u>Preventive Health Care / st [Standards]</u><br/> <u>*Preventive Health Care / am [Administration]</u><br/> <u>Program Development</u><br/> <u>*Program Evaluation</u><br/> <u>Questionnaires</u><br/> <u>Random Assignment</u><br/> <u>United States</u></p> | <p>*Acquired Immune Deficiency Syndrome;<br/> *Cultural Sensitivity;<br/> *Prevention; *Program Evaluation</p> |



|                                                                                                                                                                                                                                                                                                                   |                                                                                                                                                                                                                                                                                                                                                                                                                                                                       |                  |  |                                                                                                                                                                                                            |
|-------------------------------------------------------------------------------------------------------------------------------------------------------------------------------------------------------------------------------------------------------------------------------------------------------------------|-----------------------------------------------------------------------------------------------------------------------------------------------------------------------------------------------------------------------------------------------------------------------------------------------------------------------------------------------------------------------------------------------------------------------------------------------------------------------|------------------|--|------------------------------------------------------------------------------------------------------------------------------------------------------------------------------------------------------------|
| <p><b>16. Hovey, JD<br/>Booker, V<br/>Seligman, LD.<br/>(2007).</b> <i>Using theatrical presentations as a means of disseminating knowledge of HIV/AIDS risk factors to migrant farmworkers: An evaluation of the effectiveness of the Informate program.</i> <u>Journal of Immigrant Health</u>, 9, 147-156.</p> | <p>MH - Adolescent<br/>MH - Adult<br/>MH - *Agriculture<br/>MH - California<br/>MH - Child<br/>MH - *Drama<br/>MH - Female<br/>MH - HIV Infections/*prevention &amp; control/transmission<br/>MH - *Health Knowledge, Attitudes, Practice<br/>MH - Humans<br/>MH - Male<br/>MH - Program Evaluation<br/>MH - Questionnaires<br/>MH - Risk Factors<br/>MH - *Transients and Migrants</p>                                                                               | <p>not found</p> |  | <p>not found</p>                                                                                                                                                                                           |
| <p><b>17. Kaplan, EH<br/>Soskolne, V Adler,<br/>B Leventhal, A<br/>Shtarkshall RA.<br/>(2002).</b> <i>A model-based evaluation of a cultural mediator outreach program for HIV positive Ethiopian immigrants in Israel.</i> <u>Evaluation Review</u>, 26(4), 382-394.</p>                                         | <p>MH - *Community-Institutional Relations<br/>MH - *Emigration and Immigration<br/>MH - Ethiopia/ethnology<br/>MH - Female<br/>MH - HIV Infections/ethnology/*prevention &amp; control/transmission<br/>MH - Humans<br/>MH - Israel/epidemiology<br/>MH - Male<br/>MH - Models, Statistical<br/>MH - Pregnancy<br/>MH - Pregnancy Complications, Infectious/ethnology/prevention &amp; control<br/>MH - Program Evaluation/*methods<br/>MH - Safe Sex/*ethnology</p> | <p>not found</p> |  | <p>(ERIC)<br/>Acquired Immune Deficiency Syndrome; Cultural Awareness; Cultural Differences; Foreign Countries; Health Education; Immigrants; Models; Outreach Programs; Program Evaluation; Sexuality</p> |

|                                                                                                                                                                                                                                                                    |                                                                                                                                                                                                                                                                                                                                                                                                                                                                                              |                                                                                                                                                                                                                                                                                                                                                                                                                                                                                                                                                                            |                                                                                                                                                                                                                                                                                                                                                                                                                                                                                                                                                                                                                                   |                                                                                                                                                             |
|--------------------------------------------------------------------------------------------------------------------------------------------------------------------------------------------------------------------------------------------------------------------|----------------------------------------------------------------------------------------------------------------------------------------------------------------------------------------------------------------------------------------------------------------------------------------------------------------------------------------------------------------------------------------------------------------------------------------------------------------------------------------------|----------------------------------------------------------------------------------------------------------------------------------------------------------------------------------------------------------------------------------------------------------------------------------------------------------------------------------------------------------------------------------------------------------------------------------------------------------------------------------------------------------------------------------------------------------------------------|-----------------------------------------------------------------------------------------------------------------------------------------------------------------------------------------------------------------------------------------------------------------------------------------------------------------------------------------------------------------------------------------------------------------------------------------------------------------------------------------------------------------------------------------------------------------------------------------------------------------------------------|-------------------------------------------------------------------------------------------------------------------------------------------------------------|
| <p><b>18. Carballo-Diequez, A Dolezal, C Leu, CS Nieves, L Diaz F Decena, C Balan I (2005).</b> <i>A randomized controlled trial to test an HIV-prevention intervention for Latino gay and bisexual men: lessons learned.</i> <u>AIDS Care.</u> 17(3), 314-28.</p> | <p>MH - Adolescent<br/> MH - Adult<br/> MH - Aged<br/> MH - Bisexuality/ethnicity/*psychology<br/> MH - Female<br/> MH - HIV Infections/ethnicity/*prevention &amp; control<br/> MH - Hispanic Americans/*psychology<br/> MH - Homosexuality, Male/ethnicity/*psychology<br/> MH - Humans<br/> MH - Male<br/> MH - Middle Aged<br/> MH - New York City/ethnicity<br/> MH - Power (Psychology)<br/> MH - Unsafe Sex/ethnicity/*prevention &amp; control/psychology<br/> MH - Urban Health</p> | <p>Subject Headings:<br/> *<u>AIDS Prevention</u><br/> *<u>Bisexuality</u><br/> *<u>Hispanics</u><br/> *<u>Male Homosexuality</u><br/> *<u>Safe Sex</u><br/> <u>Empowerment</u><br/> <u>Intervention</u></p> <p>Key concepts<br/> <u>Latino gay men, Latino bisexual men, HIV prevention intervention, unsafe sex reduction, empowerment theory</u></p>                                                                                                                                                                                                                    | <p><u>Adult</u><br/> <u>Anal Intercourse</u><br/> *<u>Bisexuality</u><br/> <u>Clinical Assessment Tools</u><br/> <u>Descriptive Statistics</u><br/> *<u>Empowerment</u><br/> <u>Funding Source</u><br/> *<u>Health Behavior</u><br/> *<u>Hispanics</u><br/> *<u>Homosexuality</u><br/> <u>Intervention Trials</u><br/> <u>Interviews</u><br/> <u>Male</u><br/> <u>Men's Health</u><br/> <u>Middle Age</u><br/> <u>New York</u><br/> <u>Prospective Studies</u><br/> <u>Questionnaires</u><br/> <u>Random Assignment</u><br/> *<u>Safe Sex</u><br/> <u>Secondary Analysis</u><br/> <u>Self Report</u><br/> <u>Translations</u></p> | <p>*Prevention; *Risk; *Males;<br/> *Acquired Immune Deficiency Syndrome;<br/> *Homosexuality;<br/> *Bisexuality; *Sexual Behavior; *Hispanic Americans</p> |
| <p><b>19. Choi, KH Lew, S Vittinghoff, E Cattania, JA Barrett, DC Coates DJ (1996).</b> <i>The efficacy of brief group counseling in HIV risk reduction among homosexual Asian and Pacific Islander men.</i> <u>AIDS.</u> 10(1), 81-7.</p>                         | <p>MH - Adult<br/> MH - *Asian Americans<br/> MH - *Counseling<br/> MH - HIV Infections/*ethnicity/*prevention &amp; control<br/> MH - *Homosexuality, Male<br/> MH - Humans<br/> MH - Male<br/> MH - Pacific Islands/ethnicity<br/> MH - Risk Factors<br/> MH - San Francisco<br/> MH - Self Concept<br/> MH - Sex Education<br/> MH - Sexual Behavior<br/> MH - Sexual Partners</p>                                                                                                        | <p>Subject Headings:<br/> *<u>AIDS Prevention</u><br/> *<u>Asians</u><br/> *<u>Cultural Sensitivity</u><br/> *<u>Group Counseling</u><br/> *<u>Male Homosexuality</u><br/> <u>Health Attitudes</u><br/> <u>Health Knowledge</u><br/> <u>HIV</u><br/> <u>Risk Taking</u><br/> <u>Self Concept</u><br/> <u>Social Support</u></p> <p>Key concepts<br/> <u>culturally appropriate self identity &amp; social support &amp; safe sex &amp; HIV knowledge &amp; attitudes &amp; risk reduction, HIV positive vs negative homosexual male Asians &amp; Pacific Islanders</u></p> |                                                                                                                                                                                                                                                                                                                                                                                                                                                                                                                                                                                                                                   | <p>not found</p>                                                                                                                                            |

|                                                                                                                                                                                                                                 |                                                                                                                                                                                                                                                                                                                                                                                                                                                                                                                                                                |                                                                                                                                                                                                                                                                                                                                                             |                                                                                                                                                                                                                                                                                                                                                                                                                                                                                                                                                                                                                                                                                                                                       |                                                                                                                                                                                                                                                                     |
|---------------------------------------------------------------------------------------------------------------------------------------------------------------------------------------------------------------------------------|----------------------------------------------------------------------------------------------------------------------------------------------------------------------------------------------------------------------------------------------------------------------------------------------------------------------------------------------------------------------------------------------------------------------------------------------------------------------------------------------------------------------------------------------------------------|-------------------------------------------------------------------------------------------------------------------------------------------------------------------------------------------------------------------------------------------------------------------------------------------------------------------------------------------------------------|---------------------------------------------------------------------------------------------------------------------------------------------------------------------------------------------------------------------------------------------------------------------------------------------------------------------------------------------------------------------------------------------------------------------------------------------------------------------------------------------------------------------------------------------------------------------------------------------------------------------------------------------------------------------------------------------------------------------------------------|---------------------------------------------------------------------------------------------------------------------------------------------------------------------------------------------------------------------------------------------------------------------|
| <p><b>20. Nyamathi, AM, Flaskerud, J Bennett, C Leake, B Lewis C. (1994).</b><br/> <i>Evaluation of two AIDS education programs for impoverished Latina women.</i><br/> <u>AIDS Education and Prevention</u> 6(4), 296-309.</p> | <p>MH - Acquired Immunodeficiency Syndrome/*prevention &amp; control/psychology/transmission<br/> MH - Adolescent<br/> MH - Adult<br/> MH - Aged<br/> MH - Female<br/> MH - Follow-Up Studies<br/> MH - *Health Education<br/> MH - Health Knowledge, Attitudes, Practice<br/> MH - Hispanic<br/> Americans/*education/psychology<br/> MH - Homeless<br/> Persons/*education/psychology<br/> MH - Humans<br/> MH - Los Angeles<br/> MH - Middle Aged<br/> MH - *Poverty<br/> MH - *Program Evaluation<br/> MH - Social Support<br/> MH - *Urban Population</p> | <p>Subject Headings:<br/> *<u>AIDS Prevention</u><br/> *<u>Health Education</u><br/> *<u>Hispanics</u><br/> *<u>Human Females</u><br/> *<u>Poverty</u><br/> <u>Drug Addiction</u><br/> <u>Homeless</u></p> <p>Key concepts<br/> <u>culturally sensitive AIDS education programs, impoverished homeless or drug addicted Latina female 18-75 yr olds</u></p> | <p>*<u>Acquired Immunodeficiency Syndrome / pc [Prevention and Control]</u><br/> <u>Adolescence</u><br/> <u>Adult</u><br/> <u>Analysis of Variance</u><br/> <u>California</u><br/> <u>Content Validity</u><br/> <u>Female</u><br/> *<u>Health Education</u><br/> *<u>Hispanics</u><br/> *<u>Homeless Persons / ed [Education]</u><br/> <u>Lazarus Theory of Stress and Coping</u><br/> <u>Loglinear Models</u><br/> <u>Middle Age</u><br/> *<u>Poverty</u><br/> *<u>Program Evaluation</u><br/> <u>Quasi-Experimental Studies</u><br/> <u>Questionnaires</u><br/> <u>Random Sample</u><br/> <u>Repeated Measures</u><br/> <u>Research Instruments</u><br/> <u>Scales</u><br/> <u>Substance Dependence</u><br/> <u>Urban Areas</u></p> | <p>*Acquired Immune Deficiency Syndrome;<br/> *Educational Programs;<br/> *Program Evaluation;<br/> *Latin American Cultural Groups;<br/> *Low Income Groups;<br/> *Womens Health Care;<br/> *Homelessness;<br/> *Drug Addiction;<br/> *Los Angeles, California</p> |
| <p><b>TOTAL</b> (found on each database)</p>                                                                                                                                                                                    | <p><b>19</b></p>                                                                                                                                                                                                                                                                                                                                                                                                                                                                                                                                               | <p><b>14</b></p>                                                                                                                                                                                                                                                                                                                                            | <p><b>11</b></p>                                                                                                                                                                                                                                                                                                                                                                                                                                                                                                                                                                                                                                                                                                                      | <p><b>11</b></p>                                                                                                                                                                                                                                                    |
